# Supplementary material for: Safety and Efficacy of 90Y-FAPI-46 Radioligand Therapy in Patients with Advanced Sarcoma and Other Cancer Entities
Source: Oxford University Press journal article supplement (doi:10.1158/1078-0432.ccr-22-1432), 2022-07-14
Supplement: ccr-22-1432_supplementary_figure_s1_supps1.docx [file ccr-22-1432_supplementary_figure_s1_supps1.docx]

**SUPPLEMENTAL MATERIAL**

**
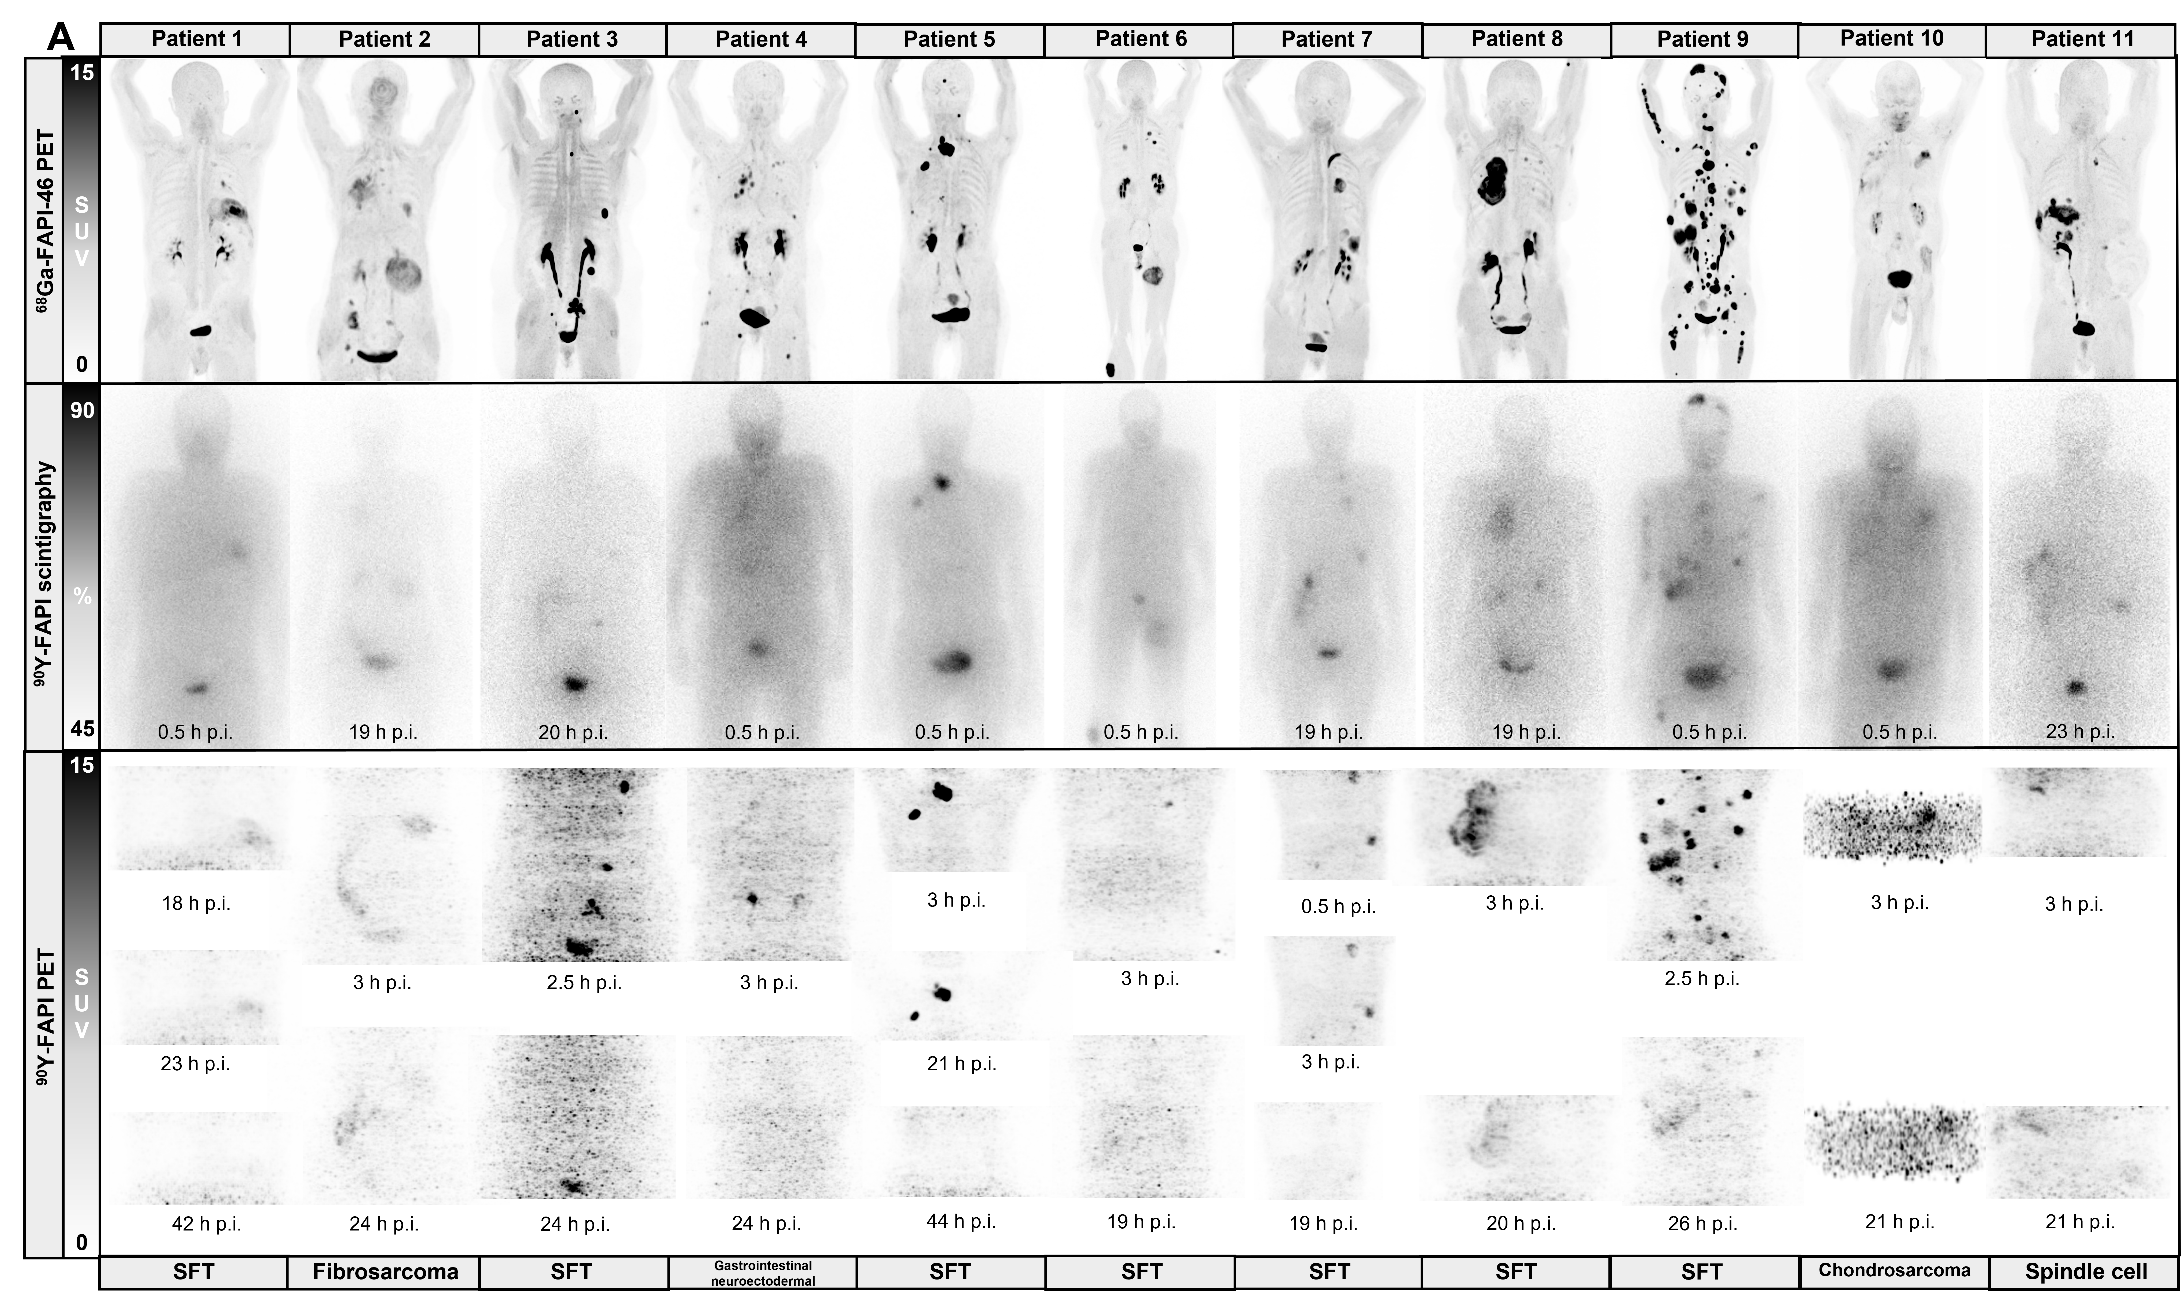
**

**
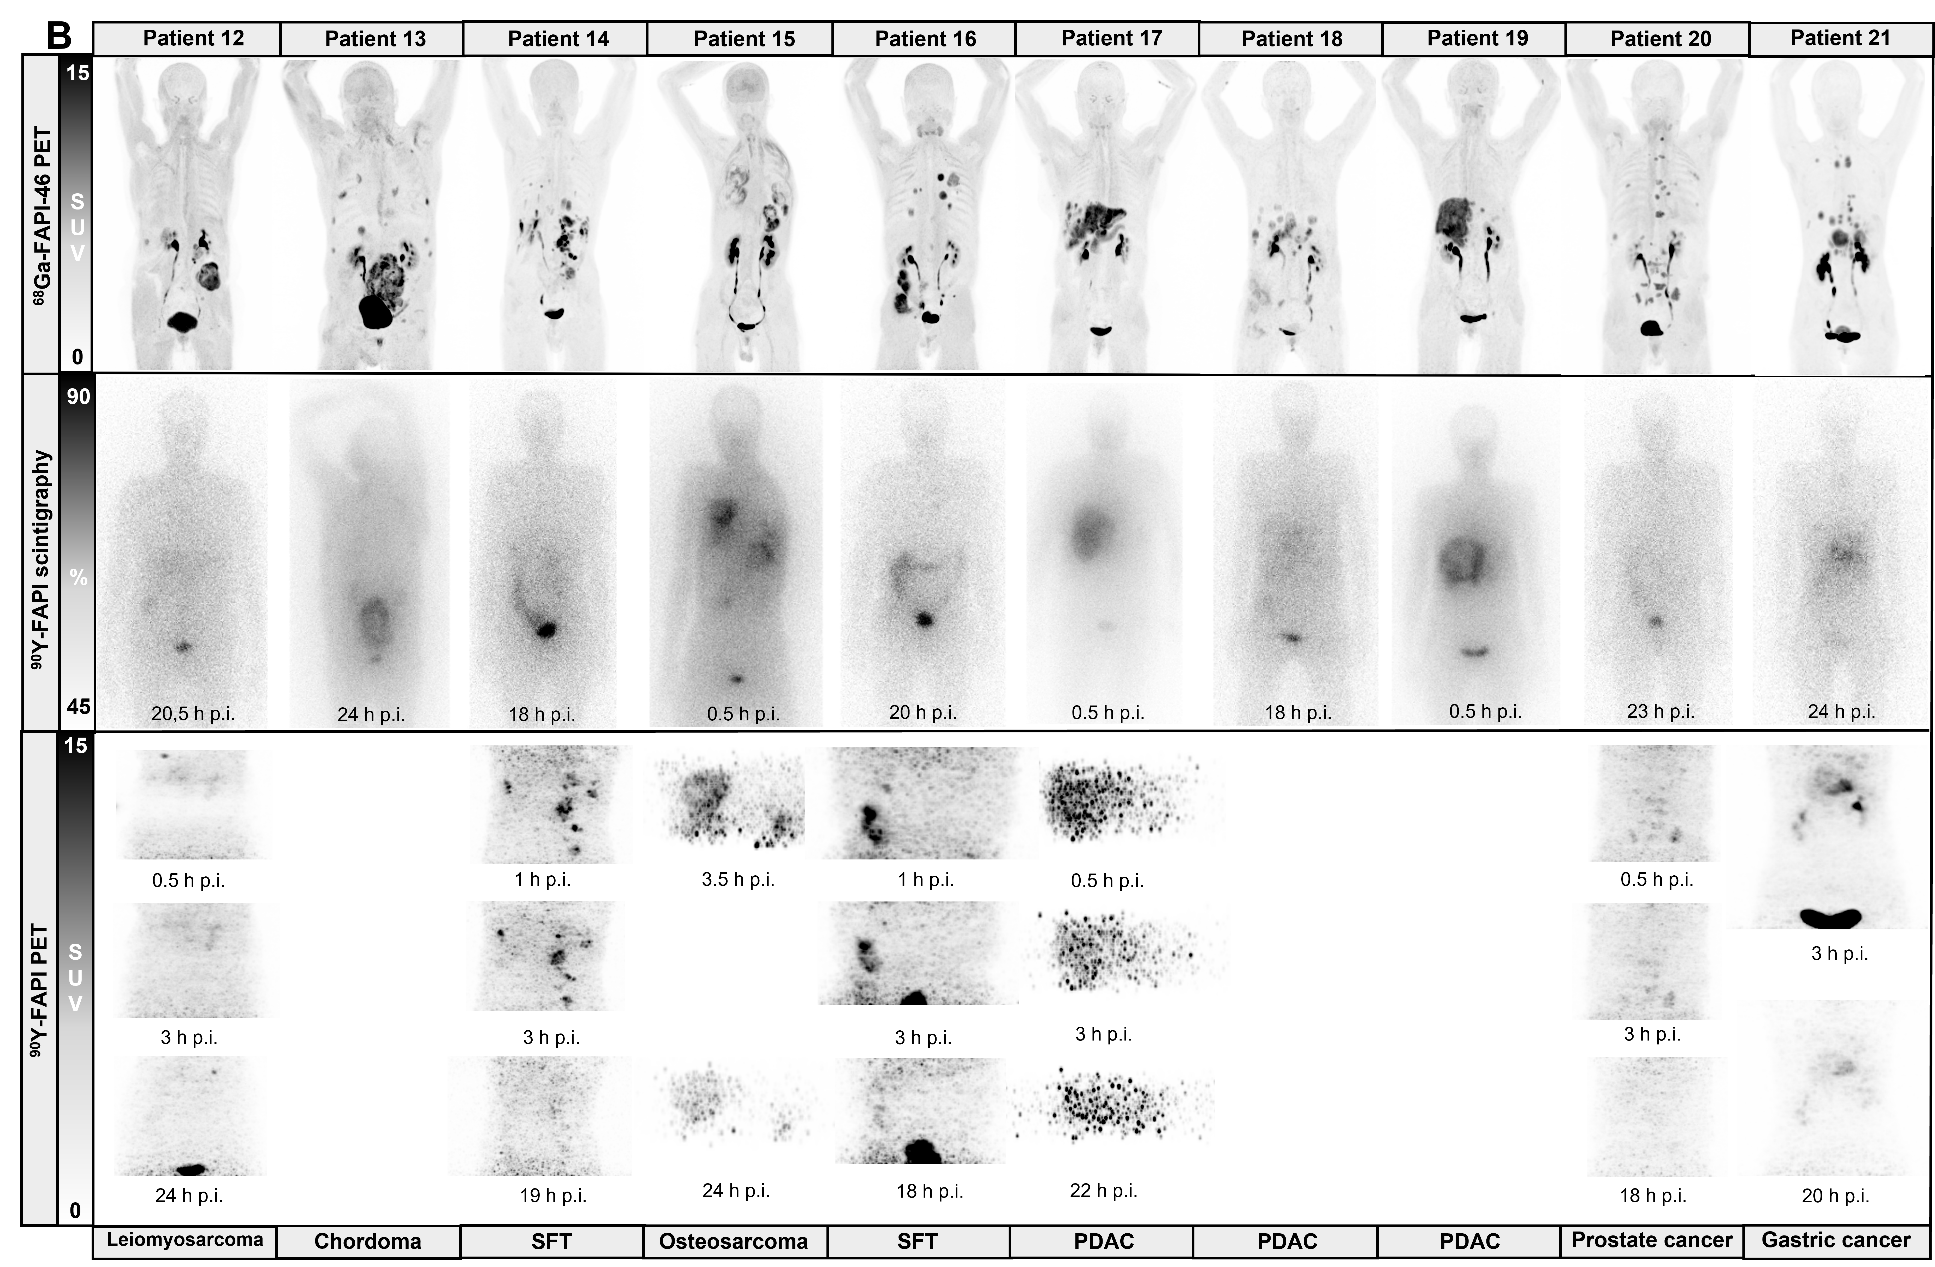
**

**Supplemental Figure 1: Pre-therapeutic 68Ga-FAPI-46 PET and post-treatment 90Y-FAPI-46 imaging after the first cycle of 90Y-FAPI-46 radioligand therapy for patients 1 to 11 (A) and 12 to 21 (B).** 90Y-FAPI-46 PET is shown for patients with diagnostic quality scans. SFT, solitary fibrous tumor.
